# Supplementary material for: Effects of a Low-Carbohydrate Dietary Intervention on Hemoglobin A1c: A Randomized Clinical Trial
Source: PubMed Central journal article supplement (PMC9606840; doi:10.1001/jamanetworkopen.2022.38645), 2022-10-26
Supplement: jamanetwopen-e2238645-s003.pdf [file jamanetwopen-e2238645-s003.pdf]

## Data Sharing Statement

Dorans. Effects of a Low-Carbohydrate Dietary Intervention on Hemoglobin A<sub>1c</sub>. *JAMA Netw Open*. Published October 26, 2022. doi:10.1001/jamanetworkopen.2022.38645

### Data

**Data available:** Yes

**Data types:** Deidentified participant data

**How to access data:** [kdorans@tulane.edu](mailto:kdorans@tulane.edu)

**When available:** With publication

### Supporting Documents

**Document types:** Statistical/analytic code

**How to access documents:** [kdorans@tulane.edu](mailto:kdorans@tulane.edu)

**When available:** With publication

### Additional Information

**Who can access the data:** Researchers whose proposed use of the data has been approved

**Types of analyses:** Research purpose

**Mechanisms of data availability:** With approval of a proposal and investigator
